# Supplementary material for: A phase II study of chemotherapy in combination with telomerase peptide vaccine (GV1001) as second-line treatment in patients with metastatic colorectal cancer
Source: PubMed Central journal article supplement (PMC8899359; doi:10.7150/jca.70385), 2022-02-14
Supplement: jcav13p1363s1.pdf [file jcav13p1363s1.pdf]

**Table S1.** Univariable and multivariable analyses for progression-free survival and overall survival in mITT patients (n = 44)

|                         | Progression-free survival |         |                  |         | Overall survival  |         |                   |         |
|-------------------------|---------------------------|---------|------------------|---------|-------------------|---------|-------------------|---------|
|                         | Univariable               |         | Multivariable    |         | Univariable       |         | Multivariable     |         |
|                         | HR (95% CI)               | P-value | HR (95% CI)      | P-value | HR (95% CI)       | P-value | HR (95% CI)       | P-value |
| Age (years)             |                           |         |                  |         |                   |         |                   |         |
| <65                     | ref                       |         | ref              |         | ref               |         | -                 | -       |
| ≥65                     | 2.32 (1.04-5.14)          | 0.039   | 3.37 (1.34-8.49) | 0.010   | 1.34 (0.34-5.30)  | 0.673   | -                 | -       |
| Sex                     |                           |         |                  |         |                   |         |                   |         |
| Male                    | ref                       |         | Ref              |         | ref               |         | -                 | -       |
| Female                  | 1.40 (0.65-3.03)          | 0.386   | 1.23 (0.54-2.81) | 0.620   | 1.10 (0.36-3.32)  | 0.870   | -                 | -       |
| ECOG performance status |                           |         |                  |         |                   |         |                   |         |
| 0                       | ref                       |         | Ref              |         | ref               |         | ref               |         |
| 1 or 2                  | 1.88 (0.84-4.17)          | 0.124   | 2.60 (1.01-6.69) | 0.048   | 4.24 (1.18-15.21) | 0.027   | 3.77 (0.80-17.89) | 0.094   |
| Disease status          |                           |         |                  |         |                   |         |                   |         |
| Recurrent               | Ref                       |         | Ref              |         | ref               |         | ref               |         |
| Initially metastatic    | 1.54 (0.67-3.55)          | 0.306   | 1.38 (0.58-3.31) | 0.466   | 2.13 (0.59-7.68)  | 0.246   | 1.03 (0.26-4.10)  | 0.962   |
| Site of primary tumor   |                           |         |                  |         |                   |         |                   |         |
| Other                   | ref                       |         | -                | -       | ref               |         | -                 | -       |
| Rt-sided                | 1.12 (0.37-3.36)          | 0.838   | -                | -       | 1.40 (0.37-5.29)  | 0.622   | -                 | -       |

|                               |                  |       |   |   |                   |       |                   |       |
|-------------------------------|------------------|-------|---|---|-------------------|-------|-------------------|-------|
| Histological differentiation  |                  |       |   |   |                   |       |                   |       |
| Poor/undifferentiated         | ref              |       | - | - | ref               |       | -                 | -     |
| Well/moderate                 | 1.35 (0.39-4.63) | 0.635 | - | - | 0.78 (0.17-3.56)  | 0.752 | -                 | -     |
| Previous first-line treatment |                  |       |   |   |                   |       |                   |       |
| Others                        | ref              |       | - | - | ref               |       | -                 | -     |
| FOLFOX/FOLFIRI +<br>Cetuximab | 1.22 (0.53-2.82) | 0.639 | - | - | 1.36 (0.45-4.11)  | 0.587 | -                 | -     |
| RAS mutation                  |                  |       |   |   |                   |       |                   |       |
| Wild type                     | ref              |       | - | - | ref               |       | -                 | -     |
| Mutant                        | 1.38 (0.52-3.66) | 0.518 | - | - | 0.55 (0.06-4.64)  | 0.581 | -                 | -     |
| Number of metastatic site     |                  |       |   |   |                   |       |                   |       |
| 1-2                           | ref              |       | - | - | ref               |       | ref               |       |
| ≥3                            | 1.46 (0.40-5.23) | 0.566 | - | - | 2.18 (0.47-10.24) | 0.322 | 4.74 (0.70-32.09) | 0.111 |
